# Supplementary material
Source: ML conference proceedings conference paper supplement (https://proceedings.mlr.press/v84/suzuki18a.html)
Supplement: Supplementary file [file suzuki18a-supp.pdf]

---

–Supplementary material–  
Fast generalization error bound of deep learning  
from a kernel perspective

---

Taiji Suzuki

taiji@mist.i.u-tokyo.ac.jp

Graduate School of Information Science and Technology, The University of Tokyo  
PRESTO, Japan Science and Technology Agency, Japan  
Center for Advanced Integrated Intelligence Research, RIKEN, Tokyo, Japan

## A Approximation error bound and $L_\infty$ -norm bound of the finite dimensional model

### A.1 Approximation error bound

To derive the approximation error bound, we utilize the following proposition that was proven by Bach (2017).

**Proposition 1.** *For  $\lambda > 0$ , there exists a probability density  $q_\ell(\tau)$  with respect to the measure  $Q_\ell$  such that, for any  $\delta \in (0, 1)$ , i.i.d. sample  $v_1, \dots, v_m$  from  $q_\ell$  satisfies that*

$$\sup_{\|f\|_{\mathcal{H}_\ell} \leq 1} \inf_{\beta \in \mathbb{R}^m: \|\beta\|_2^2 \leq \frac{4}{m}} \left\| f - \sum_{j=1}^m \beta_j q_\ell(v_j)^{-1/2} \eta(F_{\ell-1}(\cdot, v_j)) \right\|_{L_2(P(X))}^2 \leq 4\lambda,$$

with probability  $1 - \delta$ , if

$$m \geq 5N_\ell(\lambda) \log(16N_\ell(\lambda)/\delta).$$

By the scale invariance of  $\eta$ ,  $\eta(ax) = a\eta(x)$  ( $a > 0$ ), we have the following proposition based on Proposition 1.

**Lemma 1.** *For  $\lambda > 0$ , and any  $1/2 > \delta > 0$ , if*

$$m \geq 5N_\ell(\lambda) \log(16N_\ell(\lambda)/\delta),$$

then there exist  $v_1, \dots, v_m \in \mathcal{T}_\ell$ ,  $w_1, \dots, w_m > 0$  such that

$$\sup_{\|f\|_{\mathcal{H}_\ell} \leq R} \inf_{\beta \in \mathbb{R}^m: \|\beta\|_2^2 \leq \frac{4R^2}{m}} \left\| f - \sum_{j=1}^m \beta_j \eta(w_j F_{\ell-1}(\cdot, v_j)) \right\|_{L_2(P(X))}^2 \leq 4\lambda R^2,$$

and

$$\frac{1}{m} \sum_{j=1}^m w_j^2 \leq (1 - 2\delta)^{-1}.$$

*Proof.* Notice that  $\mathbb{E}[\frac{1}{m} \sum_{j=1}^m q_\ell(v_j)^{-1}] = \mathbb{E}[q_\ell(v)^{-1}] = \int_{\mathcal{T}_\ell} q_\ell(v)^{-1} q_\ell(v) dQ_\ell(v) = \int_{\mathcal{T}_\ell} 1 dQ_\ell(v) = 1$ , thus an i.i.d. sequence  $\{v_1, \dots, v_m\}$  satisfies  $\frac{1}{m} \sum_{j=1}^m q_\ell(v_j)^{-1} \leq 1/(1 - 2\delta)$  with probability  $2\delta$  by the Markov's inequality. Combining this with Proposition 1, the i.i.d. sequence  $\{v_1, \dots, v_m\}$  and  $w_j = q_\ell(v_j)^{-1/2}$  satisfies the condition in the statement with probability  $1 - (\delta + 1 - 2\delta) = \delta > 0$ . This ensures the existence of sequences  $\{v_j\}_{j=1}^m$  and  $\{w_j\}_{j=1}^m$  that satisfy the assertion.  $\square$

From now on, we define

$$c_0 = 4, \quad c_1 = 4, \quad c_\delta = (1 - 2\delta)^{-1}.$$

Based on the proposition, we approximate  $f^\circ$  given by the integral form (2) by a finite dimensional model  $f^*$  given as follows: let  $m_\ell$  be the number of nodes in the  $\ell$ -th internal layer (we set the dimensions of the output and input layers to  $m_{L+1} = 1$  and  $m_1 = d_x$ ) and consider a model

$$\begin{aligned} f_\ell^*(g) &= W^{(\ell)}\eta(g) + b^{(\ell)} \quad (g \in \mathbb{R}^{m_\ell}, \ell = 2, \dots, L), \\ f_1^*(x) &= W^{(1)}x + b^{(1)}, \\ f^*(x) &= f_L^* \circ f_{L-1}^* \circ \dots \circ f_1^*(x), \end{aligned}$$

where  $W^{(\ell)} \in \mathbb{R}^{m_{\ell+1} \times m_\ell}$  and  $b^{(\ell)} \in \mathbb{R}^{m_{\ell+1}}$ .

The next lemma gives an approximation error bound between  $f^\circ$  and  $f^*$ . The  $L_\infty$ -norm bounds of  $f^\circ$  and  $f^*$  are given later in Lemma 3. Substituting  $\delta \leftarrow \delta/2$  into the statement in the following Lemma 2 and letting  $\hat{c}_\delta = c_1 c_{\delta/2}$ , we derive the approximation error  $\hat{\delta}_{1,n}$  in Theorem 1 in the main body.

**Lemma 2** (Approximation error bound of the nonparametric model). *For any  $1/2 > \delta > 0$  and given  $\lambda_\ell > 0$ , let  $m_\ell \geq 5N_\ell(\lambda_\ell) \log(16N_\ell(\lambda_\ell)/\delta)$ . Then there exist  $W^{(\ell)} \in \mathbb{R}^{m_{\ell+1} \times m_\ell}$  and  $b^{(\ell)} \in \mathbb{R}^{m_{\ell+1}}$  ( $\ell = 1, \dots, L$ ) where  $m_{L+1} = 1$  and  $m_1 = d_x$  such that*

$$\begin{aligned} \|W^{(\ell)}\|_F^2 &\leq c_1 c_\delta R^2, \quad \|b^{(\ell)}\|_2 \leq \sqrt{c_\delta} R_b \quad (\ell = 1, \dots, L-1), \\ \|W^{(L)}\|_F^2 &\leq c_1 R^2, \quad \|b^{(L)}\|_2 \leq R_b, \end{aligned}$$

and

$$\|f^\circ - f^*\|_{L_2(P(X))} \leq \sum_{\ell=2}^L \sqrt{(c_1 c_\delta)^{L-\ell} c_0} R^{L-\ell+1} \sqrt{\lambda_\ell}.$$

*Proof.* We construct the asserted finite dimensional network recursively from  $\ell = L$  to  $\ell = 1$ . Let  $\{v_j^{(\ell)}\}_{j=1}^{m_\ell}$  and  $\{w_j^{(\ell)}\}_{j=1}^{m_\ell}$  be the sequences given in Proposition 1. Let  $\widehat{\mathcal{T}}_\ell = \{v_j^{(\ell)}\}_{j=1}^{m_\ell}$ . With slight abuse of notation, we identify  $f_\ell^* : \mathbb{R}^{m_\ell} \rightarrow \mathbb{R}^{m_{\ell+1}}$  to a function  $f_\ell^* : \widehat{\mathcal{T}}_\ell \rightarrow \widehat{\mathcal{T}}_{\ell+1}$  in a canonical way. For a function  $F : \mathbb{R}^{d_x} \times \widehat{\mathcal{T}}_\ell \rightarrow \mathbb{R}$ , we denote by  $f_\ell^*[F](x, v_i^{(\ell+1)})$  to express  $f_\ell^*[F(x, \cdot)](v_i^{(\ell+1)}) = \sum_{j=1}^{m_\ell} W_{i,j}^{(\ell)} F(x, v_j^{(\ell)}) + b_i^{(\ell)}$  for  $v_i^{(\ell+1)} \in \widehat{\mathcal{T}}_{\ell+1}$ . When we write  $f_\ell^*[F]$  for  $F : \mathbb{R}^{d_x} \times \mathcal{T}_\ell \rightarrow \mathbb{R}$  ( $(x, v) \mapsto F(x, v)$ ), we deal with  $F$  as a restriction of  $F$  on  $\mathbb{R}^{d_x} \times \widehat{\mathcal{T}}_\ell$ . We define the output from the  $\ell$ -th layer of the approximated network  $f^*$  as  $F_\ell^*(x, v)$  for  $v \in \widehat{\mathcal{T}}_\ell$  and  $x \in \mathbb{R}^{d_x}$ . More precisely, it is recursively defined as  $F_\ell^*(x, v) = f_\ell^*[F_{\ell-1}^*](x, v)$ .

We use an analogous notation for other networks such as  $f_\ell^\circ$ . That is,  $F_\ell^\circ(x, v) = (f_\ell^\circ \circ \dots \circ f_1^\circ(x))(v)$  for  $v \in \mathcal{T}_\ell$  and  $x \in \mathbb{R}^{d_x}$ , and  $F_\ell^\circ(x, v) = f_\ell^\circ[F_{\ell-1}^\circ](x, v)$ .

**Step 1** (the last layer,  $\ell = L$ ).

We consider the following approximation of the  $L$ -th layer (the last layer): Remember that  $m_{L+1} = 1$  and thus the output from the  $L$ -th layer is just one dimensional. We denote by  $\mathcal{T}_{L+1} = \{1\}$  which is the index set of the output (which is just a singleton consisting of an element 1). As a candidate of a good approximation to the true  $L$ -th layer, define

$$\tilde{f}_L^*[F_{L-1}](x, 1) = \sum_{j=1}^{m_L} \sqrt{m_L} \beta_j^{(L)} \eta \left( \frac{1}{\sqrt{m_L}} w_j^{(L)} F_{L-1}(x, v_j^{(L)}) \right) + b_L \quad (\text{S-1})$$

by  $\beta^{(L)} \in \mathbb{R}^{m_L}$  and  $w^{(L)} \in \mathbb{R}^{m_L}$  satisfying  $\|\beta^{(L)}\|_2^2 \leq \frac{1}{m_L} c_1 R^2$  and  $\|w^{(L)}\|_2^2 \leq m_L c_\delta$ . Here, define that

$$W_{1,:}^{(L)} = \sqrt{m_L} \beta^{(L)\top}, \quad b^{(L)} = (b_L^\circ(1)).$$

Note that the model (S-1) can be rewritten as

$$\tilde{f}_L^*[F_{L-1}](x, 1) = \sum_{j=1}^{m_L} W_{1,j}^{(L)} \eta(\sqrt{m_L}^{-1} w_j^{(L)} F_{L-1}(x, v_j^{(L)})) + b_1^{(L)}.$$

Because of Proposition 1 and Assumption 1, the norms of the weight  $W^{(L)}$  and the bias  $b^{(L)}$  are bounded as

$$\|W^{(L)}\|_F = \|W_{1,:}^{(L)}\|_2 \leq \sqrt{c_1}R, \quad \|b^{(L)}\|_2 = |b_L| \leq Rb. \quad (\text{S-2})$$

By the Cauchy-Schwartz inequality and the Lipschitz continuity of  $\eta$ , we have that

$$\begin{aligned} & |\tilde{f}_L^*[F_{L-1}](x, 1) - \tilde{f}_L^*[F'_{L-1}](x, 1)| \\ & \leq \left| \sum_{j=1}^{m_L} W_{1,j}^{(L)} (\eta(\sqrt{m_L}^{-1} w_j^{(L)} F_{L-1}(x, v_j^{(L)})) - \eta(\sqrt{m_L}^{-1} w_j^{(L)} F'_{L-1}(x, v_j^{(L)}))) \right| \\ & \leq \|W_{1,:}^{(L)}\|_2 \sqrt{m_L}^{-1} \|(w_j^{(L)} (F_{L-1}(x, v_j^{(L)}) - F'_{L-1}(x, v_j^{(L)})))_{j=1}^{m_L}\|_2 \\ & \leq \|W_{1,:}^{(L)}\|_2 \sqrt{m_L}^{-1} \|w^{(L)}\|_2 \|(F_{L-1}(x, v_j^{(L)}) - F'_{L-1}(x, v_j^{(L)}))_{j=1}^{m_L}\|_{\max} \\ & \leq \sqrt{c_1 R^2} \sqrt{c_\delta m_L / m_L} \|(F_{L-1}(x, v_j^{(L)}) - F'_{L-1}(x, v_j^{(L)}))_{j=1}^{m_L}\|_{\max} \\ & = \sqrt{c_1 c_\delta} R \|(F_{L-1}(x, v_j^{(L)}) - F'_{L-1}(x, v_j^{(L)}))_{j=1}^{m_L}\|_{\max}, \end{aligned}$$

for  $F_{L-1}, F'_{L-1} : \widehat{\mathcal{T}}_L \times \mathbb{R}^{d_x} \rightarrow \mathbb{R}$ . Moreover, Proposition 1 ensures that  $\beta^{(L)}$  and  $w^{(L)}$  can be taken so that

$$\|\tilde{f}_L^*[F_{L-1}^\circ](\cdot, 1) - f_L^\circ[F_{L-1}^\circ](\cdot, 1)\|_{L_2(P(X))}^2 \leq c_0 \lambda_L R^2.$$

Hereinafter, we fix  $\beta^{(L)}$  and  $w^{(L)}$  so that this inequality and the norm bound (S-2) are satisfied.

**Step 2** (internal layers for  $\ell = 2, \dots, L-1$ ). As for the  $\ell$ -th internal layer, we consider the following approximation:

$$\tilde{f}_\ell^*[g](v_i^{(\ell+1)}) = \sum_{j=1}^{m_\ell} \sqrt{m_\ell} \beta_{i,j}^{(\ell)} \eta(\sqrt{m_\ell}^{-1} w_j^{(\ell)} g(v_j^{(\ell)})) + b_\ell^\circ(v_i^{(\ell+1)}),$$

for  $g : \widehat{\mathcal{T}}_\ell \rightarrow \mathbb{R}$  with  $\beta^{(\ell)} \in \mathbb{R}^{m_{\ell+1} \times m_\ell}$  and  $w^{(\ell)} \in \mathbb{R}^{m_\ell}$  satisfying  $\|\beta_{i,:}^{(\ell)}\|_2^2 \leq \frac{1}{m_\ell} c_1 R^2$  ( $\forall j = 1, \dots, m_{\ell+1}$ ) and  $\|w^{(\ell)}\|_2^2 \leq m_\ell c_\delta$ . Then, the Lipschitz continuity of  $\tilde{f}_\ell^*$  can be shown as

$$\begin{aligned} & |\tilde{f}_\ell^*[F_{\ell-1}](x, v_i^{(\ell+1)}) - \tilde{f}_\ell^*[F'_{\ell-1}](x, v_i^{(\ell+1)})| \\ & \leq \left| \sum_{j=1}^{m_\ell} \sqrt{m_\ell} \beta_{i,j}^{(\ell)} (\eta(\sqrt{m_\ell}^{-1} w_j^{(\ell)} F_{\ell-1}(x, v_j^{(\ell)})) - \eta(\sqrt{m_\ell}^{-1} w_j^{(\ell)} F'_{\ell-1}(x, v_j^{(\ell)}))) \right| \\ & \leq \|\beta_{i,:}^{(\ell)}\|_2 \|w^{(\ell)}\|_2 \|(F_{\ell-1}(x, v_j^{(\ell)}) - F'_{\ell-1}(x, v_j^{(\ell)}))_{j=1}^{m_\ell}\|_{\max} \\ & \leq \sqrt{\frac{c_1}{m_\ell}} R \sqrt{c_\delta m_\ell} \|(F_{\ell-1}(x, v_j^{(\ell)}) - F'_{\ell-1}(x, v_j^{(\ell)}))_{j=1}^{m_\ell}\|_{\max} \\ & = \sqrt{c_1 c_\delta} R \|(F_{\ell-1}(x, v_j^{(\ell)}) - F'_{\ell-1}(x, v_j^{(\ell)}))_{j=1}^{m_\ell}\|_{\max}, \end{aligned}$$

for any  $v_i^{(\ell+1)} \in \widehat{\mathcal{T}}_{(\ell+1)}$ . Proposition 1 asserts that there exist  $\beta^{(\ell)}$  and  $w^{(\ell)}$  that give an upper bound of the approximation error of the  $\ell$ -th layer as

$$\max_{j=1, \dots, m_\ell} \|\tilde{f}_\ell^*[F_{\ell-1}^\circ](\cdot, v_j^{(\ell+1)}) - f_\ell^\circ[F_{\ell-1}^\circ](\cdot, v_j^{(\ell+1)})\|_{L_2(P(X))}^2 \leq c_0 \lambda_\ell R^2.$$

Finally, let

$$W_{ij}^{(\ell)} = \sqrt{\frac{m_\ell}{m_{\ell+1}}} \beta_{ij}^{(\ell)} w_i^{(\ell+1)}, \quad b^{(\ell)} = \frac{1}{\sqrt{m_{\ell+1}}} (w_1^{(\ell+1)} b_\ell^\circ(v_1^{(\ell+1)}), \dots, w_{m_{\ell+1}}^{(\ell+1)} b_\ell^\circ(v_{m_{\ell+1}}^{(\ell+1)}))^\top,$$

then, by Assumption 1 and Proposition 1, the norms of these quantities can be bounded as

$$\begin{aligned} \|W^{(\ell)}\|_F^2 &= \frac{m_\ell}{m_{\ell+1}} \sum_{i=1}^{m_{\ell+1}} \sum_{j=1}^{m_\ell} \beta_{ij}^{(\ell)^2} w_i^{(\ell+1)^2} \\ &\leq \frac{m_\ell}{m_{\ell+1}} \sum_{i=1}^{m_{\ell+1}} w_i^{(\ell+1)^2} \frac{c_1 R^2}{m_\ell} \leq c_1 c_\delta R^2, \end{aligned}$$

and

$$\|b^{(\ell)}\|_2^2 \leq \frac{1}{m_{\ell+1}} \sum_{j=1}^{m_{\ell+1}} w^{(\ell+1)}{}^2 R_b^2 \leq c_\delta R_b^2.$$

**Step 3** (the first layer,  $\ell = 1$ ).

For the first layer, let

$$\tilde{f}^*(x, v_i^{(2)}) = \sum_{j=1}^{d_x} h_1^\circ(v_i^{(2)}, j) Q_1(j) x_j + b_1^\circ(v_i^{(2)})$$

for  $v_i^{(2)} \in \widehat{\mathcal{T}}_2$ . By the definition of  $f^\circ$ , it holds that

$$\tilde{f}^*(x, v_i^{(2)}) = f^\circ(x, v_i^{(2)}).$$

Let  $W^{(1)} = \frac{1}{\sqrt{m_2}} (Q_1(j) w_i^{(2)} h_1^\circ(v_i^{(2)}, j))_{i,j} \in \mathbb{R}^{m_2 \times d_x}$  and  $b^{(1)} = \frac{1}{\sqrt{m_2}} (w_1^{(2)} b_1^\circ(1), \dots, w_{m_2}^{(2)} b_1^\circ(m_2))^\top \in \mathbb{R}^{m_2}$ . Then, by Assumption 1 and Proposition 1, it holds that

$$\begin{aligned} \|W^{(1)}\|_{\mathbb{F}}^2 &= \sum_{i=1}^{m_2} \sum_{j=1}^{d_x} \frac{1}{m_2} w_i^{(2)2} h_1^\circ(v_i^{(2)}, j)^2 Q_1(j)^2 \\ &\leq \left( \sum_{i=1}^{m_2} \frac{1}{m_2} w_i^{(2)2} \right) \max_{1 \leq i \leq m_2} \left( \sum_{j=1}^{d_x} h_1^\circ(v_i^{(2)}, j)^2 Q_1(j)^2 \right) \\ &\leq c_\delta \max_{1 \leq i \leq m_2} \left( \sum_{j=1}^{d_x} h_1^\circ(v_i^{(2)}, j)^2 Q_1(j) \right) \leq c_\delta R^2, \end{aligned}$$

and

$$\|b^{(1)}\|_2^2 \leq \frac{1}{m_1} \sum_{i=1}^{m_2} w_i^{(2)2} R_b^2 \leq c_\delta R_b^2.$$

**Step 4.**

Finally, we combine the results we have obtained above. Note that

$$\begin{aligned} &\|f_L^\circ \circ f_{L-1}^\circ \circ \dots \circ f_1^\circ - \tilde{f}_L^* \circ \tilde{f}_{L-1}^* \circ \dots \circ \tilde{f}_1^*\|_{L_2(P(X))} \\ &= \|f_L^\circ \circ f_{L-1}^\circ \circ \dots \circ f_1^\circ - \tilde{f}_L^* \circ f_{L-1}^\circ \circ \dots \circ f_1^\circ \\ &\quad \vdots \\ &\quad + \tilde{f}_L^* \circ \dots \circ \tilde{f}_{\ell+1}^* \circ f_\ell^\circ \circ f_{\ell-1}^\circ \circ \dots \circ f_1^\circ - \tilde{f}_L^* \circ \dots \circ \tilde{f}_{\ell+1}^* \circ \tilde{f}_\ell^* \circ f_{\ell-1}^\circ \circ \dots \circ f_1^\circ \\ &\quad \vdots \\ &\quad + \tilde{f}_L^* \circ \dots \circ \tilde{f}_2^* \circ f_1^\circ - \tilde{f}_L^* \circ \dots \circ \tilde{f}_2^* \circ \tilde{f}_1^*\|_{L_2(P(X))} \\ &\leq \sum_{\ell=1}^L \|\tilde{f}_L^* \circ \dots \circ \tilde{f}_{\ell+1}^* \circ f_\ell^\circ \circ f_{\ell-1}^\circ \circ \dots \circ f_1^\circ - \tilde{f}_L^* \circ \dots \circ \tilde{f}_{\ell+1}^* \circ \tilde{f}_\ell^* \circ f_{\ell-1}^\circ \circ \dots \circ f_1^\circ\|_{L_2(P(X))}. \end{aligned}$$

Then combining the argument given above, we have

$$\begin{aligned} &\|\tilde{f}_L^* \circ \dots \circ \tilde{f}_{\ell+1}^* \circ f_\ell^\circ \circ f_{\ell-1}^\circ \circ \dots \circ f_1^\circ - \tilde{f}_L^* \circ \dots \circ \tilde{f}_{\ell+1}^* \circ \tilde{f}_\ell^* \circ f_{\ell-1}^\circ \circ \dots \circ f_1^\circ\|_{L_2(P(X))} \\ &\leq (\sqrt{c_1 c_\delta} R)^{L-\ell} (\sqrt{c_0 \lambda_\ell} R) = \sqrt{(c_1 c_\delta)^{L-\ell} c_0 R^{L-\ell+1} \lambda_\ell}, \end{aligned}$$

for  $\ell = 2, \dots, L$ . And the right hand side is 0 for  $\ell = 1$ . This yields that

$$\|f^\circ - \tilde{f}^*\|_{L_2(P(X))} \leq \sum_{\ell=2}^L R^{L-\ell+1} \sqrt{(c_1 c_\delta)^{L-\ell} c_0} \sqrt{\lambda_\ell}.$$

By substituting  $W^{(\ell)}$  and  $b^{(\ell)}$  for  $\ell = 1, \dots, L$  defined above into the definition of  $f^*$ , then it is easy to see that

$$f^* = \tilde{f}^*$$

as a function. Then, we obtain the assertion. □

## A.2 Bounding the $L_\infty$ -norm

The next lemma shows the  $L_\infty$ -norm of the true function  $f^\circ$  and that of  $f \in \mathcal{F}$ .

**Lemma 3.** *Under Assumptions 1, 2 and 3, the  $L_\infty$ -norms of  $f^\circ$  and that of  $f \in \mathcal{F}$  are bounded as*

$$\begin{aligned} \|f^\circ\|_\infty &\leq R^L D_x + \sum_{\ell=1}^L R^{L-\ell} R_b, \\ \|f\|_\infty &\leq (\sqrt{c_1 c_\delta})^L R^L D_x + \sum_{\ell=1}^L (\sqrt{c_1 c_\delta} R)^{L-\ell} \bar{R}_b. \end{aligned}$$

*Proof.* Suppose that

$$\|F_{\ell-1}^\circ(x, \cdot)\|_{L_2(Q_\ell)} \leq G.$$

Then,  $F_\ell^\circ$  can be bounded inductively: for all  $\tau \in \mathcal{T}_{\ell+1}$

$$\begin{aligned} |F_\ell^\circ(x, \tau)| &= \left| \int_{\mathcal{T}_\ell} h_\ell^\circ(\tau, w) \eta(F_{\ell-1}^\circ(x, w)) dQ_\ell(w) + b_\ell^\circ(\tau) \right| \\ &\leq \|h_\ell^\circ(\tau, \cdot)\|_{L_2(Q_\ell)} \|F_{\ell-1}^\circ(x, \cdot)\|_{L_2(Q_\ell)} + |b_\ell^\circ(\tau)| \\ &\leq RG + R_b, \end{aligned}$$

by Assumption 1. Similarly, as for  $\ell = 1$ , it holds that, for all  $\tau \in \mathcal{T}_2$  and  $x \in \mathbb{R}^{d_x}$ ,

$$\begin{aligned} |f_1^\circ(x, \tau)| &= \left| \sum_{i=1}^{d_x} h_1^\circ(\tau, i) x_i Q_1(i) + b_1^\circ(\tau) \right| \\ &\leq \left| \sum_{i=1}^{d_x} h_1^\circ(\tau, i) x_i Q_1(i) \right| + |b_1^\circ(\tau)| \\ &\leq \|h_1^\circ(\tau, \cdot)\|_{L_2(Q_1)} \|x\|_{L_2(Q_1)} + R_b \\ &\leq RD_x + R_b. \end{aligned}$$

Applying the same argument recursively, we have

$$\|f^\circ\|_\infty \leq R^L D_x + \sum_{\ell=1}^L R^{L-\ell} R_b.$$

We can bound the  $L_\infty$ -norm of any  $f \in \mathcal{F}$  through a similar argument. Note that  $W^{(\ell)}$  satisfies  $\|W^{(\ell)}\|_F \leq \sqrt{c_1 c_\delta} R$  for  $\ell = 1, \dots, L-1$ ,  $W^{(L)}$  satisfies  $\|W^{(L)}\|_F \leq \sqrt{c_1} R$ , and  $b^{(\ell)}$  satisfies  $\|b^{(\ell)}\|_2 \leq \sqrt{c_\delta} R_b$  by its construc-

tion. Therefore, though a similar argument to the bound for  $f^\circ$ , we have that

$$\begin{aligned} \|f\|_\infty &\leq \sqrt{c_1}R \left[ \prod_{\ell=2}^{L-1} (\sqrt{c_1 c_\delta} R) \right] \sqrt{c_\delta} R D_x \\ &\quad + \left( \sum_{\ell=1}^{L-2} \sqrt{c_1}R \left[ \prod_{\ell'=\ell+1}^{L-1} (\sqrt{c_1 c_\delta} R) \right] \sqrt{c_\delta} R b + \sqrt{c_1}R \sqrt{c_\delta} R b + \sqrt{c_\delta} R b \right) \\ &\leq (c_1 c_\delta)^{L/2} R^L D_x + \sum_{\ell=1}^L (\sqrt{c_1 c_\delta} R)^{L-\ell} \bar{R}_b. \end{aligned}$$

□

## B Bounding the posterior contraction rate (proof of Theorem 2)

In this section, we prove Theorem 2. The proof is divided into two parts: posterior contraction rate with respect to the in-sample error (i.e., the empirical  $L_2$ -norm  $\|f\|_n = \sqrt{\sum_{i=1}^n f(x_i)^2/n}$ ) and that with respect to the out-of-sample error (i.e., the population  $L_2$ -norm  $\|f\|_{L_2(P_X)} = \sqrt{\int f(X)^2 dP(X)}$ ).

Here, let

$$\epsilon_n = \hat{\delta}_{1,n} + \sigma \hat{\delta}_{2,n}, \quad \tilde{\epsilon}_n = \hat{\delta}_{1,n} + \hat{\delta}_{2,n}.$$

### B.1 In-sample error

Here we show the in-sample error bound. Let  $X_n = (x_1, \dots, x_n)$ ,  $Y_n = (y_1, \dots, y_n)$  and  $D_n = (X_n, Y_n)$ . For given  $X_n$ , the probability distribution of  $Y_n$  associated with a function  $f$  (i.e.,  $y_i = f(x_i) + \epsilon_i$ ) is denoted by  $P_{n,f}$ . The expectation of a function  $h$  of  $Y_n$  with respect to  $P_{n,f}$  is denoted by  $P_{n,f}(h)$ . The density function of  $P_{n,f}$  with respect to  $Y_n$  is denoted by  $p_{n,f}$ .

For  $\tilde{r} \geq 1$ , let  $\mathcal{A}_{\tilde{r}}$  be the event such that

$$\int \frac{p_{n,f}(Y_n)}{p_{n,f^\circ}(Y_n)} \Pi(df) \geq \exp(-n\tilde{c}_n^2 \tilde{r}^2 / \sigma^2) \Pi(f : \|f - f^*\|_\infty \leq \hat{\delta}_{2,n} \tilde{r}).$$

The probability of this event is bounded by Lemma 4.

Using a test function  $\phi_n$  defined later (here, a test function is a measurable function of  $D_n$  that takes its value in  $[0, 1]$ ), we decompose the expected posterior mass as

$$\begin{aligned} &\mathbb{E} \left[ \Pi(\|f - f^\circ\|_n \geq \sqrt{2}\epsilon_n r | D_n) \right] \\ &\leq \mathbb{E}[\phi_n] + P(\mathcal{A}_{\tilde{r}}^c) \\ &\quad + \mathbb{E}[(1 - \phi_n) \mathbf{1}_{\mathcal{A}_{\tilde{r}}} \Pi(f \in \mathcal{F}^c | D_n)] \\ &\quad + \mathbb{E}[(1 - \phi_n) \mathbf{1}_{\mathcal{A}_{\tilde{r}}} \Pi(f \in \mathcal{F} : \|f - f^\circ\|_n^2 \geq 2\epsilon r^2 | D_n)] \\ &=: A_n + B_n + C_n + D_n, \end{aligned} \tag{S-3}$$

for  $\epsilon_n > 0$  where the expectation is taken with respect to  $D_n = (X_n, Y_n)$  distributed from the true distribution. We give an upper bound of  $A_n$ ,  $B_n$ ,  $C_n$  and  $D_n$  in the following.

### Step 1.

For arbitrary  $r' > 0$ , define  $C_{r'} = \{f \in \mathcal{F} \mid r' \leq \sqrt{n}\|f - f^\circ\|_n/\sigma\}$ . We construct a maximum cardinality set  $\Theta_{r'} \subset C_{r'}$  such that each  $f, f' \in \Theta_{r'}$  satisfies  $\sqrt{n}\|f - f'\|_n/\sigma \geq r'/2$ . Here we denote by  $D(\epsilon, \mathcal{F}, \|\cdot\|)$  the  $\epsilon$ -packing number of a normed space  $\mathcal{F}$  attached with a norm  $\|\cdot\|$ . Then, the cardinality of  $\Theta_{r'}$  is equal to

$D(r'/2, C_{r'}, \sqrt{n}\|\cdot\|_n/\sigma)$ . Then, following Lemma 13 of van der Vaart and van Zanten (2011), one can construct a test  $\tilde{\phi}_{r'}$  such that

$$\begin{aligned} P_{n,f \circ \tilde{\phi}_{r'}} &\leq 9D(r'/2, C_{r'}, \sqrt{n}\|\cdot\|_n/\sigma) e^{-\frac{1}{8}r'^2} \leq 9D(r'/2, \mathcal{F}, \sqrt{n}\|\cdot\|_n/\sigma) e^{-\frac{1}{8}r'^2}, \\ \sup_{f \in C_{r'}} P_{n,f}(1 - \tilde{\phi}_{r'}) &\leq e^{-\frac{1}{8}r'^2}, \end{aligned}$$

for any  $r' > 0$ .

Substituting  $\sqrt{2}\sqrt{n}\epsilon_n r/\sigma$  into  $r'$  and denoting  $\phi_n = \tilde{\phi}_{\sqrt{2}\sqrt{n}\epsilon_n r/\sigma}$ , we obtain

$$P_{n,f \circ \phi_n} \leq 9e^{-\frac{1}{4\sigma^2}n\epsilon_n^2 r^2 + \log(D(r'/2, \mathcal{F}, \sqrt{n}\|\cdot\|_n/\sigma))} \quad (\text{S-4})$$

$$\sup_{f \in C_{2\sqrt{2}\sqrt{n}\epsilon_n r}} P_{n,f}(1 - \phi_n) \leq e^{-\frac{1}{4\sigma^2}n\epsilon_n^2 r^2}. \quad (\text{S-5})$$

Hence, we just need to evaluate the (log-)packing number  $\log(D(r'/2, \mathcal{F}, \sqrt{n}\|\cdot\|_n/\sigma))$  where  $r' = \sqrt{2n}\epsilon_n r/\sigma$ . It is known that the packing number is bounded from above by the internal covering number<sup>1</sup>, and the packing number of unit ball in  $d$ -dimensional Euclidean space and that of the covering number is bounded as

$$D(\epsilon, \mathcal{B}_d(1), \|\cdot\|) \leq N(\epsilon, \mathcal{B}_d(1), \|\cdot\|) \leq \left(\frac{4+\epsilon}{\epsilon}\right)^d.$$

Based on this we evaluate the packing number of  $\mathcal{F}$ .

Let  $f, f' \in \mathcal{F}$  be two functions corresponding to parameters  $(W^{(\ell)}, b^{(\ell)})_{\ell=1}^L$  and  $(W'^{(\ell)}, b'^{(\ell)})_{\ell=1}^L$ . Notice that if  $\|W^{(\ell)} - W'^{(\ell)}\|_{\mathbb{F}} \leq \epsilon$  and  $\|b^{(\ell)} - b'^{(\ell)}\| \leq \epsilon$ , then

$$\|f - f'\|_{\infty} \leq L\bar{R}^{L-1}D_x + \sum_{\ell=1}^L \epsilon \bar{R}^{L-\ell} = \epsilon(L\bar{R}^{L-1}D_x + \sum_{\ell=1}^L \bar{R}^{L-\ell}). \quad (\text{S-6})$$

Therefore, if  $\epsilon \leq \delta/\hat{G}$  where

$$\hat{G} = (L\bar{R}^{L-1}D_x + \sum_{\ell=1}^L \bar{R}^{L-\ell}),$$

then  $\|f - f'\|_{\infty} \leq \delta$ . Hence, the packing number of the function space  $\mathcal{F}$  can be bounded by using that of the parameter space as

$$\begin{aligned} \log(D(r'/2, \mathcal{F}, \sqrt{n}\|\cdot\|_n/\sigma)) &= \log(D(r'/2, \mathcal{F}, \sqrt{n}\|\cdot\|_n/\sigma)) \leq \log(D(\sigma r'/(2\sqrt{n}), \mathcal{F}, \|\cdot\|_{\infty})) \\ &\leq \log(N(\sigma r'/(2\sqrt{n}), \mathcal{F}, \|\cdot\|_{\infty})) \\ &\leq \sum_{\ell=1}^L \log(N(\sigma r'/(2\sqrt{n}\hat{G}), \mathcal{B}_{m_{\ell+1} \times m_{\ell}}(\bar{R}), \|\cdot\|)) + \sum_{\ell=1}^L \log(N(\sigma r'/(2\sqrt{n}\hat{G}), \mathcal{B}_{m_{\ell}}(\bar{R}_b), \|\cdot\|)) \\ &\leq \sum_{\ell=1}^L m_{\ell+1} m_{\ell} \log\left(\frac{4 + \frac{\sigma r'}{2\sqrt{n}\hat{G}\bar{R}}}{\frac{\sigma r'}{2\sqrt{n}\hat{G}\bar{R}}}\right) + \sum_{\ell=1}^L m_{\ell} \log\left(\frac{4 + \frac{\sigma r'}{2\sqrt{n}\hat{G}\bar{R}_b}}{\frac{\sigma r'}{2\sqrt{n}\hat{G}\bar{R}_b}}\right) \\ &= \sum_{\ell=1}^L m_{\ell+1} m_{\ell} \log\left(1 + \frac{4\sqrt{2}\hat{G}\bar{R}}{\epsilon_n r}\right) + \sum_{\ell=1}^L m_{\ell} \log\left(1 + \frac{4\sqrt{2}\hat{G}\bar{R}_b}{\epsilon_n r}\right). \end{aligned} \quad (\text{S-7})$$

Therefore, by Eq. (S-4), we have that

$$A_n \leq 9 \exp\left[-\frac{1}{4\sigma^2}n\epsilon_n^2 r^2 + \sum_{\ell=1}^L m_{\ell+1} m_{\ell} \log\left(1 + \frac{4\sqrt{2}\hat{G}\bar{R}}{\epsilon_n r}\right) + \sum_{\ell=1}^L m_{\ell} \log\left(1 + \frac{4\sqrt{2}\hat{G}\bar{R}_b}{\epsilon_n r}\right)\right].$$

<sup>1</sup>The  $\epsilon$ -internal covering number of a (semi)-metric space  $(T, d)$  is the minimum cardinality of a finite set such that every element in  $T$  is in distance  $\epsilon$  from the finite set with respect to the metric  $d$ . We denote by  $N(\epsilon, T, d)$  the  $\epsilon$ -internal covering number of  $(T, d)$ .

**Step 2.** Here, we evaluate  $B_n$ . It can be evaluated by Lemma 4 as

$$B_n \leq \exp(-n\tilde{\epsilon}_n^2\tilde{r}^2/(8\sigma^2)) + \exp(-n\hat{\delta}_{1,n}^2(\tilde{r}^2 - 1)^2/(11\hat{R}_\infty^2)).$$

**Step 3.** Since  $\mathcal{F}$  is the support of the prior distribution, it is obvious that  $C_n = 0$ .

**Step 4.** Here, we evaluate  $D_n$ . Remind that  $D_n$  is defined as

$$D_n = \mathbb{E}_{X_n} \left[ P_{n,f^\circ} [\Pi(f \in \mathcal{F} : \|f - f^\circ\|_n > \sqrt{2}\epsilon r | Y_n) (1 - \phi_n) \mathbf{1}_{\mathcal{A}_{\tilde{r}}}] \right].$$

Define

$$\Xi_n(\tilde{r}) := -\log(\Pi(f : \|f - f^*\|_\infty \leq \hat{\delta}_{2,n}\tilde{r}))$$

for  $\tilde{r} > 0$ . Then,  $D_n$  can be bounded as

$$\begin{aligned} D_n &= \mathbb{E}_{X_n} \left\{ P_{n,f^\circ} \left[ \frac{\int_{\mathcal{F}} \mathbf{1}\{f : \|f - f^\circ\|_n > \sqrt{2}\epsilon r\} p_{n,f} d\Pi(f)}{\int_{\mathcal{F}} p_{n,f} d\Pi(f)} (1 - \phi_n) \mathbf{1}_{\mathcal{A}_{\tilde{r}}} \right] \right\} \\ &= \mathbb{E}_{X_n} \left\{ P_{n,f^\circ} \left[ \frac{\int_{\mathcal{F}} \mathbf{1}\{f : \|f - f^\circ\|_n > \sqrt{2}\epsilon r\} \frac{p_{n,f}}{p_{n,f^\circ}} d\Pi(f)}{\int_{\mathcal{F}} \frac{p_{n,f}}{p_{n,f^\circ}} d\Pi(f)} (1 - \phi_n) \mathbf{1}_{\mathcal{A}_{\tilde{r}}} \right] \right\} \\ &\leq \mathbb{E}_{X_n} \left\{ P_{n,f^\circ} \left[ \int_{f \in \mathcal{F} : \|f - f^\circ\|_n > \sqrt{2}\epsilon r} p_{n,f}/p_{n,f^\circ} d\Pi(f) \exp(n\tilde{\epsilon}_n^2\tilde{r}^2/\sigma^2 + \Xi_n(\tilde{r})) (1 - \phi_n) \mathbf{1}_{\mathcal{A}_{\tilde{r}}} \right] \right\} \\ &= \mathbb{E}_{X_n} \left\{ \int_{f \in \mathcal{F} : \|f - f^\circ\|_n > \sqrt{2}\epsilon r} P_{n,f} [(1 - \phi_n) \mathbf{1}_{\mathcal{A}_{\tilde{r}}}] \exp(n\tilde{\epsilon}_n^2\tilde{r}^2/\sigma^2 + \Xi_n(\tilde{r})) d\Pi(f) \right\} \\ &\leq \exp\left(\frac{n\tilde{\epsilon}_n^2\tilde{r}^2}{\sigma^2} + \Xi_n(\tilde{r}) - \frac{n\tilde{\epsilon}_n^2\tilde{r}^2}{4\sigma^2}\right). \end{aligned}$$

By using the relation (S-6), the prior mass  $\Xi_n(\tilde{r})$  can be bounded as

$$\begin{aligned} \Xi_n(\tilde{r}) &= -\log(\Pi(f : \|f - f^*\|_\infty \leq \hat{\delta}_{2,n}\tilde{r})) \\ &\leq -\log(\Pi(f : \|f - f^*\|_\infty \leq \hat{\delta}_{2,n})) \\ &\leq -\sum_{\ell=1}^L \log(\Pi(W^{(\ell)} : \|W^{(\ell)} - W^{*(\ell)}\|_F \leq \hat{\delta}_{2,n}/\hat{G})) \\ &\quad - \sum_{\ell=1}^L \log(\Pi(b^{(\ell)} : \|b^{(\ell)} - b^{*(\ell)}\|_2 \leq \hat{\delta}_{2,n}/\hat{G})) \\ &\leq \sum_{\ell=1}^L m_\ell m_{\ell+1} \log(\bar{R}\hat{G}/(\hat{\delta}_{2,n}/2)) + \sum_{\ell=1}^L m_\ell \log(\bar{R}_b\hat{G}/(\hat{\delta}_{2,n}/2)). \end{aligned} \tag{S-8}$$

**Step 5.** Finally, we combine the results obtained above.



$$\begin{aligned}
 & \mathbb{E} \left[ \Pi(\|f - f^\circ\|_n \geq \sqrt{2}\epsilon_n r | Y_n) \right] \\
 & \leq 9 \exp \left[ -\frac{1}{4\sigma^2} n \epsilon_n^2 r^2 + \sum_{\ell=1}^L m_{\ell+1} m_\ell \log \left( 1 + \frac{4\sqrt{2}\hat{G}\bar{R}}{\epsilon_n r} \right) + \sum_{\ell=1}^L m_\ell \log \left( 1 + \frac{4\sqrt{2}\hat{G}\bar{R}_b}{\epsilon_n r} \right) \right] \\
 & \quad + \exp(-n\tilde{\epsilon}_n^2 \tilde{r}^2 / (8\sigma^2)) + \exp(-n\hat{\delta}_{1,n}^2 (\tilde{r}^2 - 1)^2 / (11\hat{R}_\infty^2)) \\
 & \quad + \exp \left( \frac{n}{\sigma^2} \tilde{\epsilon}_n^2 \tilde{r}^2 + \Xi_n(\tilde{r}) - \frac{n\epsilon_n^2 r^2}{4\sigma^2} \right). \tag{S-9}
 \end{aligned}$$

Now, let  $1 \leq \tilde{r} \leq r$ . Then, since  $\epsilon_n \geq \hat{\delta}_{2,n}$  and  $r \geq 1$ , we have that

$$\max \left\{ \log \left( \frac{2\hat{G}R'}{\hat{\delta}_{2,n}} \right), \log \left( 1 + \frac{4\sqrt{2}\hat{G}R'}{\epsilon_n r} \right) \right\} \leq \log \left( 1 + \frac{4\sqrt{2}\hat{G}R'}{\hat{\delta}_{2,n}} \right),$$

for all  $R' > 0$ . Now, we set  $\hat{\delta}_{2,n}$  to satisfy

$$\frac{n\hat{\delta}_{2,n}^2}{\sigma^2} \geq \sum_{\ell=1}^L m_\ell m_{\ell+1} \log \left( 1 + \frac{4\sqrt{2}\hat{G}\bar{R}}{\hat{\delta}_{2,n}} \right) + \sum_{\ell=1}^L m_\ell \log \left( 1 + \frac{4\sqrt{2}\hat{G}\bar{R}_b}{\hat{\delta}_{2,n}} \right) (\geq \Xi_n(\tilde{r})), \tag{S-10}$$

which can be satisfied by

$$\hat{\delta}_{2,n}^2 = \frac{2\sigma^2}{n} \sum_{\ell=1}^L m_\ell m_{\ell+1} \log_+ \left( 1 + \frac{4\sqrt{2}\hat{G} \max\{\bar{R}, \bar{R}_b\} \sqrt{n}}{\sigma \sqrt{\sum_{\ell=1}^L m_\ell m_{\ell+1}}} \right).$$

Then, by noticing  $n\hat{\delta}_{2,n}^2 \leq n\tilde{\epsilon}_n^2$  and Eq. (S-8), the RHS of Eq. (S-9) is upper bounded by

$$\exp(-n\tilde{\epsilon}_n^2 \tilde{r}^2 / (8\sigma^2)) + \exp(-n\hat{\delta}_{1,n}^2 (\tilde{r}^2 - 1)^2 / (11\hat{R}_\infty^2)) + 10 \exp \left[ 2 \frac{n}{\sigma^2} \tilde{\epsilon}_n^2 \tilde{r}^2 - \frac{n\epsilon_n^2 r^2}{4\sigma^2} \right].$$

Here, by setting  $r^2 = 12\tilde{r}^2 \geq 12$ , then the RHS is further bounded as

$$\begin{aligned}
 & \exp(-n\hat{\delta}_{1,n}^2 (\tilde{r}^2 - 1)^2 / (11\hat{R}_\infty^2)) + \exp(-n\tilde{\epsilon}_n^2 \tilde{r}^2 / (8\sigma^2)) + 10 \exp(-n\epsilon_n^2 \tilde{r}^2 / \sigma^2) \\
 & \leq \exp \left[ -n\hat{\delta}_{1,n}^2 (\tilde{r}^2 - 1)^2 / (11\hat{R}_\infty^2) \right] + 11 \exp(-n\tilde{\epsilon}_n^2 \tilde{r}^2 / (8\sigma^2)).
 \end{aligned}$$

**Lemma 4.** *Then, for any  $\tilde{r} > 1$ , it holds that*

$$\begin{aligned}
 P_{D_n} \left( \int \frac{p_{n,f}(Y_n)}{p_{n,f^\circ}(Y_n)} \Pi(df) \geq \exp(-n\tilde{\epsilon}_n^2 \tilde{r}^2 / \sigma^2) \Pi(f : \|f - f^*\|_\infty \leq \hat{\delta}_{2,n} \tilde{r}) \right) \\
 \geq 1 - \exp(-n\tilde{\epsilon}_n^2 \tilde{r}^2 / (8\sigma^2)) - \exp(-n\hat{\delta}_{1,n}^2 \min\{(\tilde{r}^2 - 1)^2, \tilde{r}^2 - 1\} / (11\hat{R}_\infty^2)).
 \end{aligned}$$

*Proof.* Note that Lemma 14 of van der Vaart and van Zanten (2011) showed that

$$P_{Y_n|X_n} \left( \int \frac{p_{n,f}(Y_n)}{p_{n,f^\circ}(Y_n)} \Pi(df) \geq \exp(-n\tilde{\epsilon}_n^2 \tilde{r}^2 / \sigma^2) \Pi(f : \|f - f^\circ\|_n \leq \tilde{\epsilon}_n \tilde{r}) \right) \geq 1 - \exp(-n\tilde{\epsilon}_n^2 \tilde{r}^2 / (8\sigma^2)).$$

where  $P_{Y_n|X_n}$  represents the conditional distribution of  $Y_n = (y_i)_{i=1}^n$  conditioned by  $X_n = (x_i)_{i=1}^n$ . Therefore the proof is reduced to show  $\|f - f^\circ\|_n \leq \hat{\delta}_{1,n} \tilde{r} + \|f - f^*\|_\infty$  with high probability. Note that

$$\|f - f^\circ\|_n \leq \|f - f^*\|_n + \|f^* - f^\circ\|_n \leq \|f - f^*\|_\infty + \|f^* - f^\circ\|_n.$$

Hence, we just need to show  $\|f^* - f^\circ\|_n^2 \leq \hat{\delta}_{1,n}^2 + \tilde{r}' \|f^* - f^\circ\|_{L_2(P_X)}^2 (\leq (1 + \tilde{r}') \hat{\delta}_{1,n}^2)$  with high probability for appropriately chosen  $\tilde{r}'$ . This can be shown by Bernstein's inequality:

$$P \left( \|f^* - f^\circ\|_{L_2(P_X)}^2 + \tilde{r}' \hat{\delta}_{1,n}^2 \leq \|f^* - f^\circ\|_n^2 \right) \leq \exp \left( -\frac{n\tilde{r}'^2 \hat{\delta}_{1,n}^4}{2(v + \tilde{r}' \|f^* - f^\circ\|_\infty^2 \hat{\delta}_{1,n}^2 / 3)} \right),$$

where  $v = \mathbb{E}_X[(f^*(X) - f^\circ(X))^2 - \|f^* - f^\circ\|_{L_2(P_X)}^2]^2$ . Now  $v \leq \mathbb{E}_X[(f^*(X) - f^\circ(X))^4] \leq \|f^* - f^\circ\|_\infty^2 \|f^* - f^\circ\|_{L_2(P_X)}^2 \leq \|f^* - f^\circ\|_\infty^2 \hat{\delta}_{1,n}^2$ . This yields that

$$P\left(\|f^* - f^\circ\|_{L_2(P_X)}^2 + \tilde{r}' \hat{\delta}_{1,n}^2 \leq \|f^* - f^\circ\|_\infty^2\right) \leq \exp\left[-\frac{3n \min\{\tilde{r}'^2, \tilde{r}'\}}{8} \frac{\hat{\delta}_{1,n}^2}{\|f^* - f^\circ\|_\infty^2}\right]. \quad (\text{S-11})$$

Since  $\|f^* - f^\circ\|_\infty \leq 2\hat{R}_\infty$ , the RHS is further bounded by  $\exp\left(-\frac{3n \min\{\tilde{r}'^2, \tilde{r}'\} \hat{\delta}_{1,n}^2}{32\hat{R}_\infty^2}\right)$ .

Therefore, with probability  $1 - \exp\left(-\frac{3n \hat{\delta}_{1,n}^2 \min\{\tilde{r}'^2, \tilde{r}'\}}{32\hat{R}_\infty^2}\right)$ , it holds that

$$\|f - f^\circ\|_\infty \leq \|f - f^*\|_\infty + \sqrt{\|f^* - f^\circ\|_{L_2(P_X)}^2 + \tilde{r}' \hat{\delta}_{1,n}^2} \leq \|f - f^*\|_\infty + \sqrt{1 + \tilde{r}'} \hat{\delta}_{1,n}$$

for all  $f$  such that  $\|f\|_\infty < \infty$ . Thus by setting  $\tilde{r}'$  so that  $\tilde{r} = \sqrt{1 + \tilde{r}'}$ , we obtain the assertion.  $\square$

## B.2 Out of sample error

Now, we are going to show the posterior contraction rate with respect to the out-of-sample predictive error:

$$\mathbb{E}_{D_n} [\Pi(f : \|f - f^\circ\|_{L_2(P_X)} \geq \epsilon_n r | D_n)], \quad (\text{S-12})$$

for sufficiently large  $r \geq 1$ .

To bound the posterior tail, we divide that into four parts:

$$\begin{aligned} \text{I} &= \mathbb{E}_{D_n} [\mathbf{1}_{\mathcal{A}_r^c}], \\ \text{II} &= \mathbb{E}_{D_n} [\mathbf{1}_{\mathcal{A}_r} \Pi(f : \sqrt{2}\|f - f^\circ\|_n > \epsilon_n r, \|f\|_\infty \leq \hat{R}_\infty | D_n)], \\ \text{III} &= \mathbb{E}_{D_n} [\mathbf{1}_{\mathcal{A}_r} \Pi(f : \|f - f^\circ\|_{L_2(P_X)} > \epsilon_n r \geq \sqrt{2}\|f - f^\circ\|_n, \|f\|_\infty \leq \hat{R}_\infty | D_n)], \\ \text{IV} &= \mathbb{E}_{D_n} [\mathbf{1}_{\mathcal{A}_r} \Pi(f : \|f\|_\infty > \hat{R}_\infty | D_n)]. \end{aligned}$$

The term I and II are already evaluated in Section B.1, that is, I + II is bounded by the right hand side of Eq. (S-3) which is what we have upper bounded in Section B.1.

The term III is bounded as follows. To bound this, we need to evaluate the difference between the empirical norm  $\|f - f^\circ\|_n$  and the expected norm  $\|f - f^\circ\|_{L_2(P_X)}$ , which can be done by Bernstein's inequality. Following the same argument to derive Eq. (S-11), it holds that

$$P\left(\|f - f^\circ\|_{L_2(P_X)} \geq \sqrt{2}\|f - f^\circ\|_n\right) \leq \exp\left(-\frac{n\|f - f^\circ\|_{L_2(P_X)}^2}{11\hat{R}_\infty^2}\right).$$

Therefore, we arrive at the following bound of III:

$$\begin{aligned} \text{III} &\leq \mathbb{E}_{X_n} \left[ P_{n, f^\circ} \left[ \int_{f \in \mathcal{F}: \|f - f^\circ\|_{L_2(P_X)} > \epsilon_n r \geq \sqrt{2}\|f - f^\circ\|_n} p_{n, f} / p_{n, f^\circ} d\Pi(f) \right] \exp(n\tilde{\epsilon}_n^2 \tilde{r}^2 / \sigma^2 + \Xi_n(\tilde{r})) \mathbf{1}_{\mathcal{A}_r} \right] \\ &\leq \exp(n\tilde{\epsilon}_n^2 \tilde{r}^2 / \sigma^2 + \Xi_n(\tilde{r})) \int_{f \in \mathcal{F}: \|f - f^\circ\|_{L_2(P_X)} > \epsilon_n r} P(\|f - f^\circ\|_{L_2(P_X)} \geq \sqrt{2}\|f - f^\circ\|_n) d\Pi(f) \\ &\leq \exp\left(\frac{n\tilde{\epsilon}_n^2 \tilde{r}^2}{\sigma^2} + \Xi_n(\tilde{r}) - \frac{n\epsilon_n^2 r^2}{11\hat{R}_\infty^2}\right) \\ &\leq \exp\left(\frac{2n\tilde{\epsilon}_n^2 \tilde{r}^2}{\sigma^2} - \frac{n\epsilon_n^2 r^2}{11\hat{R}_\infty^2}\right). \end{aligned}$$

Finally, since all  $f \in \mathcal{F}$  satisfies  $\|f\|_\infty \leq \hat{R}_\infty$ ,  $\text{IV} = 0$ .

Combining the results we arrive at

$$\mathbb{E}_{D_n} [\Pi(f : \|f - f^\circ\|_{L_2(P_X)} \geq \epsilon_n r | D_n)] \leq \exp \left[ -\frac{n\hat{\delta}_{1,n}^2 \min\{(\tilde{r}^2-1)^2, \tilde{r}^2-1\}}{11\hat{R}_\infty^2} \right] + 12 \exp(-n\tilde{\epsilon}_n^2 \tilde{r}^2 / (8\sigma^2)),$$

for all  $\tilde{r} \geq 1$  and  $r \geq \max\{12, 33\hat{R}_\infty^2/\sigma^2\}\tilde{r}^2$ . This concludes the proof of Theorem 2.

## C Convergence rate for the empirical risk minimizer (proof of Theorem 1)

In this section, we give the proof of Theorem 1 in the main text. To show that, we prepare some lemmas.

**Proposition 2** (Gaussian concentration inequality (Theorem 2.5.8 in Giné and Nickl (2015))). *Let  $(\xi_i)_{i=1}^n$  be i.i.d. Gaussian sequence with mean 0 and variance  $\sigma^2$ , and  $(x_i)_{i=1}^n \subset \mathcal{X}$  be a given set of input variables. Then, for a set  $\tilde{\mathcal{F}}$  of functions from  $\mathcal{X}$  to  $\mathbb{R}$  which is separable with respect to  $L_\infty$ -norm and  $\sup_{f \in \tilde{\mathcal{F}}} |\sum_{i=1}^n \frac{1}{n} \xi_i f(x_i)| < \infty$  almost surely, it holds that for every  $r > 0$ ,*

$$P \left( \sup_{f \in \tilde{\mathcal{F}}} \left| \sum_{i=1}^n \frac{1}{n} \xi_i f(x_i) \right| \geq \mathbb{E} \left[ \sup_{f \in \tilde{\mathcal{F}}} \left| \frac{1}{n} \sum_{i=1}^n \xi_i f(x_i) \right| \right] + r \right) \leq \exp[-nr^2/2(\sigma\|\tilde{\mathcal{F}}\|_n)^2]$$

where  $\|\tilde{\mathcal{F}}\|_n^2 = \sup_{f \in \tilde{\mathcal{F}}} \frac{1}{n} \sum_{i=1}^n f(x_i)^2$ . Here the probability is taken with respect to  $(\xi_i)_{i=1}^n$ .

Remind that every  $f \in \mathcal{F}$  satisfies  $\|f\|_n \leq \|f\|_\infty \leq \hat{R}_\infty$ . Hence  $\|\mathcal{F}\|_n \leq \hat{R}_\infty$ . For an observation  $(x_i)_{i=1}^n$ , let  $\mathcal{G}_\delta = \{f - f^* \mid \|f - f^*\|_n \leq \delta, f \in \mathcal{F}\}$ . It is obvious that  $\mathcal{G}_\delta$  is separable with respect to  $L_\infty$ -norm. Then, by the Gaussian concentration inequality, we have that

$$P \left( \sup_{f \in \mathcal{G}_\delta} \left| \sum_{i=1}^n \frac{1}{n} \xi_i f(x_i) \right| \geq \mathbb{E} \left[ \sup_{f \in \mathcal{G}_\delta} \left| \frac{1}{n} \sum_{i=1}^n \xi_i f(x_i) \right| \right] + r \right) \leq \exp[-nr^2/2(\sigma\delta)^2]$$

for every  $r > 0$ . By applying this inequality for  $\delta_j = 2^{j-1}\sigma/\sqrt{n}$  for  $j = 1, \dots, \lceil \log_2(\hat{R}_\infty\sqrt{n}/\sigma) \rceil$  and using the uniform bound, we can show that, for every  $r > 0$ , with probability  $\lceil \log_2(\hat{R}_\infty\sqrt{n}/\sigma) \rceil \exp[-nr^2/2\sigma^2]$ , it holds that

$$\left| \frac{1}{n} \sum_{i=1}^n \xi_i (f(x_i) - f^*(x_i)) \right| \geq \mathbb{E} \left[ \sup_{f \in \mathcal{G}_{2\delta}} \frac{1}{n} \sum_{i=1}^n \xi_i f(x_i) \right] + 2\delta r$$

uniformly for all  $f \in \mathcal{G}_\delta$  where  $\delta$  is any positive real satisfying  $\delta \geq \sigma/\sqrt{n}$ .

**Lemma 5.** *There exists a universal constant  $C$  such that for any  $\delta$  it holds that*

$$\mathbb{E} \left[ \sup_{f \in \mathcal{G}_{2\delta}} \frac{1}{n} \sum_{i=1}^n \xi_i f(x_i) \right] \leq C\sigma\delta \sqrt{\frac{\sum_{\ell=1}^L m_\ell m_{\ell+1}}{n} \log_+ \left( 1 + \frac{4\hat{G} \max\{\bar{R}, \bar{R}_b\}}{\delta} \right)}.$$

*Proof.* Since  $f \mapsto \frac{1}{\sqrt{n}} \sum_{i=1}^n \xi_i f(x_i)$  is a sub-Gaussian process relative to the metric  $\|\cdot\|_n$ . By the chaining argument (see, for example, Theorem 2.3.6 of Giné and Nickl (2015)), it holds that

$$\mathbb{E} \left[ \sup_{f \in \mathcal{G}_{2\delta}} \frac{1}{n} \sum_{i=1}^n \xi_i f(x_i) \right] \leq 4\sqrt{2} \frac{\sigma}{\sqrt{n}} \int_0^{2\delta} \sqrt{\log(2N(\epsilon, \mathcal{G}_{2\delta}, \|\cdot\|_n))} d\epsilon.$$

Since  $\log N(\epsilon, \mathcal{G}_{2\delta}, \|\cdot\|_n) \leq \log N(\epsilon, \mathcal{F}, \|\cdot\|_\infty) \leq 2 \frac{\sum_{\ell=1}^L m_\ell m_{\ell+1}}{n} \log \left( 1 + \frac{4\hat{G} \max\{\bar{R}, \bar{R}_b\}}{\epsilon} \right)$ , the right hand side is bounded by

$$\begin{aligned} \int_0^{2\delta} \sqrt{\log(2N(\epsilon, \mathcal{F}, \|\cdot\|_n))} d\epsilon &\leq \int_0^{2\delta} \sqrt{\log(2) + 2 \frac{\sum_{\ell=1}^L m_\ell m_{\ell+1}}{n} \log \left( 1 + \frac{4\hat{G} \max\{\bar{R}, \bar{R}_b\}}{\epsilon} \right)} d\epsilon \\ &\leq C\delta \sqrt{\frac{\sum_{\ell=1}^L m_\ell m_{\ell+1}}{n} \log_+ \left( 1 + \frac{4\hat{G} \max\{\bar{R}, \bar{R}_b\}}{\delta} \right)}, \end{aligned}$$

where  $C$  is a universal constant. This gives the assertion.  $\square$

Therefore, by substituting  $\delta \leftarrow \left( \|f - f^*\|_n \vee \sigma \sqrt{\frac{\sum_{\ell=1}^L m_\ell m_{\ell+1}}{n}} \right)$  and  $r \leftarrow \sigma r / \sqrt{n}$ , the following inequality holds:

$$\begin{aligned}
 & -\frac{1}{n} \sum_{i=1}^n \xi_i(f(x_i) - f^*(x_i)) \\
 & \leq C\sigma \left( \|f - f^*\|_n \vee \sqrt{\frac{\sigma^2 \sum_{\ell=1}^L m_\ell m_{\ell+1}}{n}} \right) \sqrt{\frac{\sum_{\ell=1}^L m_\ell m_{\ell+1}}{n} \log_+ \left( 1 + \frac{4\sqrt{n}\hat{G} \max\{\bar{R}, \bar{R}_b\}}{\sigma \sqrt{\sum_{\ell=1}^L m_\ell m_{\ell+1}}} \right)} \\
 & + 2 \left( \|f - f^*\|_n \vee \sqrt{\frac{\sigma^2 \sum_{\ell=1}^L m_\ell m_{\ell+1}}{n}} \right) \sigma \frac{r}{\sqrt{n}} \\
 & \leq \frac{1}{4} \left( \|f - f^*\|_n \vee \sqrt{\frac{\sigma^2 \sum_{\ell=1}^L m_\ell m_{\ell+1}}{n}} \right)^2 \\
 & + 2C^2 \sigma^2 \left( \frac{\sum_{\ell=1}^L m_\ell m_{\ell+1}}{n} \log_+ \left( 1 + \frac{4\sqrt{n}\hat{G} \max\{\bar{R}, \bar{R}_b\}}{\sigma} \right) + 4 \frac{r^2}{n} \right),
 \end{aligned}$$

uniformly for all  $f \in \mathcal{F}$  with probability  $1 - \lceil \log_2(\hat{R}_\infty \sqrt{n}/\sigma) \rceil \exp[-r^2/2]$ . Here let

$$\Psi_{r,n} := 2C^2 \sigma^2 \left( \frac{\sum_{\ell=1}^L m_\ell m_{\ell+1}}{n} \log_+ \left( 1 + \frac{4\sqrt{n}\hat{G} \max\{\bar{R}, \bar{R}_b\}}{\sigma \sqrt{\sum_{\ell=1}^L m_\ell m_{\ell+1}}} \right) + 4 \frac{r^2}{n} \right).$$

Remind that the empirical risk minimizer in the model  $\mathcal{F}$  is denoted by  $\hat{f}$ :

$$\hat{f} := \operatorname{argmin}_{f \in \mathcal{F}} \sum_{i=1}^n (y_i - f(x_i))^2.$$

Since  $\hat{f}$  minimizes the empirical risk, it holds that

$$\begin{aligned}
 & \frac{1}{n} \sum_{i=1}^n (y_i - \hat{f}(x_i))^2 \leq \frac{1}{n} \sum_{i=1}^n (y_i - f^*(x_i))^2 \\
 \Rightarrow & \frac{2}{n} \sum_{i=1}^n y_i (f^*(x_i) - \hat{f}(x_i)) + \|\hat{f}\|_n^2 - \|f^*\|_n^2 \leq 0 \\
 \Rightarrow & \frac{2}{n} \sum_{i=1}^n (\xi_i + f^\circ(x_i)) (f^*(x_i) - \hat{f}(x_i)) + \|\hat{f}\|_n^2 - \|f^*\|_n^2 \leq 0 \\
 \Rightarrow & \frac{2}{n} \sum_{i=1}^n \xi_i (f^*(x_i) - \hat{f}(x_i)) + \frac{2}{n} \sum_{i=1}^n f^\circ(x_i) (f^*(x_i) - \hat{f}(x_i)) + \|\hat{f}\|_n^2 - \|f^*\|_n^2 \leq 0 \\
 \Rightarrow & \frac{2}{n} \sum_{i=1}^n \xi_i (f^*(x_i) - \hat{f}(x_i)) + \|\hat{f} - f^\circ\|_n^2 \leq \|f^* - f^\circ\|_n^2.
 \end{aligned}$$

Therefore, we have

$$-\frac{1}{4} \left( \|\hat{f} - f^*\|_n \vee \sqrt{\frac{\sigma^2 \sum_{\ell=1}^L m_\ell m_{\ell+1}}{n}} \right)^2 - \Psi_{r,n} + \|\hat{f} - f^\circ\|_n^2 \leq \|f^* - f^\circ\|_n^2. \quad (\text{S-13})$$

Let us assume  $\|\hat{f} - f^*\|_n^2 \geq \frac{\sigma^2 \sum_{\ell=1}^L m_\ell m_{\ell+1}}{n}$ . Then, by Eq. (S-13), we have

$$\begin{aligned} & -\frac{1}{4}\|\hat{f} - f^*\|_n^2 - \Psi_{r,n} + \|\hat{f} - f^\circ\|_n^2 \leq \|f^* - f^\circ\|_n^2 \\ \Rightarrow & -\frac{1}{4}\|\hat{f} - f^*\|_n^2 - \Psi_{r,n} + \frac{1}{2}\|\hat{f} - f^*\|_n^2 - \|f^* - f^\circ\|_n^2 \leq \|f^* - f^\circ\|_n^2 \\ \Rightarrow & \frac{1}{4}\|\hat{f} - f^*\|_n^2 \leq 2\|f^* - f^\circ\|_n^2 + \Psi_{r,n}. \end{aligned} \quad (\text{S-14})$$

Otherwise, we trivially have  $\|\hat{f} - f^*\|_n^2 < \frac{\sigma^2 \sum_{\ell=1}^L m_\ell m_{\ell+1}}{n}$ .

Combining the inequalities, it holds that

$$\|\hat{f} - f^*\|_n^2 \leq 8\|f^* - f^\circ\|_n^2 + 4\Psi_{r,n} + \frac{\sigma^2 \sum_{\ell=1}^L m_\ell m_{\ell+1}}{n}. \quad (\text{S-15})$$

Based on this inequality, we derive a bound for  $\|\hat{f} - f^*\|_{L_2(P_X)}$  instead of the empirical  $L_2$ -norm  $\|\hat{f} - f^*\|_n$ .

**Proposition 3** (Talagrand's concentration inequality (Talagrand, 1996; Bousquet, 2002)). *Let  $(x_i)_{i=1}^n$  be an i.i.d. sequence of input variables in  $\mathcal{X}$ . Then, for a set  $\tilde{\mathcal{F}}$  of functions from  $\mathcal{X}$  to  $\mathbb{R}$  which is separable with respect to  $L_\infty$ -norm and  $\|f\|_\infty \leq \tilde{R}$  for all  $f \in \tilde{\mathcal{F}}$ , it holds that for every  $r > 0$ ,*

$$\begin{aligned} P \left( \sup_{f \in \tilde{\mathcal{F}}} \left| \frac{1}{n} \sum_{i=1}^n f(x_i)^2 - \mathbb{E}[f^2] \right| \geq C \left\{ \mathbb{E} \left[ \sup_{f \in \tilde{\mathcal{F}}} \left| \frac{1}{n} \sum_{i=1}^n f(x_i)^2 - \mathbb{E}[f^2] \right| \right] + \sqrt{\frac{\|\tilde{\mathcal{F}}^2\|_{L_2(P_X)}^2 r}{n} + \frac{r\tilde{R}^2}{n}} \right\} \right) \\ \leq \exp(-r) \end{aligned}$$

where  $\|\tilde{\mathcal{F}}^2\|_{L_2(P_X)}^2 = \sup_{f \in \tilde{\mathcal{F}}} \mathbb{E}[f(X)^4]$ .

Let  $\mathcal{G}'_\delta = \{f - f^* \mid \|f - f^*\|_{L_2(P_X)} \leq \delta, f \in \mathcal{F}\}$ . By the bound  $\|f\|_\infty \leq \hat{R}_\infty$  for all  $f \in \mathcal{F}$  (Lemma 3),  $\|g\|_\infty \leq 2\hat{R}_\infty$  for all  $g \in \mathcal{G}'_\delta$ . Therefore, we have  $\|\mathcal{G}'_\delta\|_{L_2(P_X)}^2 \leq 4\hat{R}_\infty^2 \delta^2$ . Hence, Talagrand's concentration inequality yields that

$$\sup_{f \in \mathcal{G}'_\delta} \left| \frac{1}{n} \sum_{i=1}^n f(x_i)^2 - \mathbb{E}[f^2] \right| \geq C_1 \left\{ \mathbb{E} \left[ \sup_{f \in \mathcal{G}'_\delta} \left| \frac{1}{n} \sum_{i=1}^n f(x_i)^2 - \mathbb{E}[f^2] \right| \right] + \sqrt{\frac{\delta^2 \hat{R}_\infty^2 r}{n} + \frac{r\hat{R}_\infty^2}{n}} \right\} \quad (\text{S-16})$$

with probability  $1 - \exp(-r)$  where  $C_1$  is a universal constant.

**Lemma 6.** *There exists a universal constant  $C > 0$  such that, for all  $\delta > 0$ ,*

$$\begin{aligned} & \mathbb{E} \left[ \sup_{f \in \mathcal{G}'_\delta} \left| \frac{1}{n} \sum_{i=1}^n f(x_i)^2 - \mathbb{E}[f^2] \right| \right] \\ & \leq C \left[ \delta \hat{R}_\infty \sqrt{\frac{\sum_{\ell=1}^L m_\ell m_{\ell+1}}{n} \log_+ \left( 1 + \frac{4\hat{G} \max\{\bar{R}, \bar{R}_b\}}{\delta} \right)} \right. \\ & \quad \left. \vee \hat{R}_\infty^2 \frac{\sum_{\ell=1}^L m_\ell m_{\ell+1}}{n} \log_+ \left( 1 + \frac{4\hat{G} \max\{\bar{R}, \bar{R}_b\}}{\delta} \right) \right]. \end{aligned}$$

*Proof.* Let  $(\epsilon_i)_{i=1}^n$  be i.i.d. Rademacher sequence. Then, by the standard argument of Rademacher complexity, we have

$$\mathbb{E} \left[ \sup_{f \in \mathcal{G}'_\delta} \left| \frac{1}{n} \sum_{i=1}^n f(x_i)^2 - \mathbb{E}[f^2] \right| \right] \leq 2\mathbb{E} \left[ \sup_{f \in \mathcal{G}'_\delta} \left| \frac{1}{n} \sum_{i=1}^n \epsilon_i f(x_i)^2 \right| \right]$$

(see, for example, Lemma 2.3.1 in van der Vaart and Wellner (1996)). Since  $\|f\|_\infty \leq 2\hat{R}_\infty$  for all  $f \in \mathcal{G}'_\delta$ , the contraction inequality (Ledoux and Talagrand, 1991, Theorem 4.12) gives an upper bound of the RHS as

$$2\mathbb{E} \left[ \sup_{f \in \mathcal{G}'_\delta} \left| \frac{1}{n} \sum_{i=1}^n \epsilon_i f(x_i)^2 \right| \right] \leq 4(2\hat{R}_\infty) \mathbb{E} \left[ \sup_{f \in \mathcal{G}'_\delta} \left| \frac{1}{n} \sum_{i=1}^n \epsilon_i f(x_i) \right| \right].$$

We further bound the RHS. By Theorem 3.1 in Giné and Koltchinskii (2006) or Lemma 2.3 of Mendelson (2002) with the covering number bound (S-7), there exists a universal constant  $C'$  such that

$$\begin{aligned} & \mathbb{E} \left[ \sup_{f \in \mathcal{G}'_\delta} \left| \frac{1}{n} \sum_{i=1}^n \epsilon_i f(x_i) \right| \right] \\ & \leq C' \left[ \delta \sqrt{\frac{\sum_{\ell=1}^L m_\ell m_{\ell+1}}{n} \log_+ \left( 1 + \frac{4\hat{G} \max\{\bar{R}, \bar{R}_b\}}{\delta} \right)} \right. \\ & \quad \left. \vee \hat{R}_\infty \frac{\sum_{\ell=1}^L m_\ell m_{\ell+1}}{n} \log_+ \left( 1 + \frac{4\hat{G} \max\{\bar{R}, \bar{R}_b\}}{\delta} \right) \right]. \end{aligned}$$

This concludes the proof.  $\square$

Let  $\Phi_n := \frac{\sum_{\ell=1}^L m_\ell m_{\ell+1}}{n} \log_+ \left( 1 + \frac{4\sqrt{n}\hat{G} \max\{\bar{R}, \bar{R}_b\}}{\hat{R}_\infty \sqrt{\sum_{\ell=1}^L m_\ell m_{\ell+1}}} \right)$ . Then, applying the inequality (S-16) for  $\delta = 2^{j-1}\hat{R}_\infty/\sqrt{n}$  for  $j = 1, \dots, \lceil \log_2(\sqrt{n}) \rceil$ , it is shown that there exists an event with probability  $1 - \lceil \log_2(\sqrt{n}) \rceil \exp(-r)$  such that, uniformly for all  $f \in \mathcal{F}$ , it holds that

$$\begin{aligned} \left| \frac{1}{n} \sum_{i=1}^n (f(x_i) - f^*(x_i))^2 - \mathbb{E}[(f - f^*)^2] \right| & \leq C_1 \left[ C(2\delta\hat{R}_\infty\sqrt{\Phi_n}) \vee (\hat{R}_\infty^2\Phi_n) + \delta \sqrt{\frac{\hat{R}_\infty^2 r}{n} + \frac{r\hat{R}_\infty^2}{n}} \right] \\ & \leq \frac{\delta^2}{2} + 2C_1^2(2C^2 + 1)\hat{R}_\infty^2\Phi_n + (C_1^2 + C_1)\frac{\hat{R}_\infty^2 r}{n}, \end{aligned}$$

where  $\delta$  is any positive real such that  $\delta^2 \geq \mathbb{E}[(f - f^*)^2]$  and  $\delta^2 \geq \hat{R}_\infty^2 \sum_{\ell=1}^L m_\ell m_{\ell+1}/n$ . The right hand side can be further bounded by

$$\frac{\delta^2}{2} + C_2\hat{R}_\infty^2 \left( \Phi_n + \frac{r}{n} \right)$$

for an appropriately defined universal constant  $C_2$ . Applying this inequality for  $f = \hat{f}$  to Eq. (S-15) gives that

$$\frac{1}{2}\|\hat{f} - f^*\|_{L_2(P_X)}^2 \leq C_2\hat{R}_\infty^2 \left( \Phi_n + \frac{r}{n} \right) + 8\|f^* - f^\circ\|_n^2 + 4\Psi_{r,n} + \left( \frac{\sigma^2 + \hat{R}_\infty^2}{n} \right) \sum_{\ell=1}^L m_\ell m_{\ell+1}.$$

Finally, by the Bernstein's inequality (S-11), the term  $\|f^* - f^\circ\|_n^2$  is bounded as

$$\|f^* - f^\circ\|_n^2 \leq (1 + \tilde{r}')\|f^* - f^\circ\|_{L_2(P_X)}^2 \leq (1 + \tilde{r}')\hat{\delta}_{1,n}^2$$

with probability  $1 - \exp\left(-\frac{3n\hat{\delta}_{1,n}^2\tilde{r}'^2}{32\hat{R}_\infty^2}\right)$  for every  $\tilde{r}' > 0$ .

Combining all inequalities, we obtain that

$$\|\hat{f} - f^*\|_{L_2(P_X)}^2 \leq 2C_2\hat{R}_\infty^2 \left( \Phi_n + \frac{r}{n} \right) + 16(1 + \tilde{r}')\hat{\delta}_{1,n}^2 + 4\Psi_{r,n} + \frac{2(\sigma^2 + \hat{R}_\infty^2)}{n} \sum_{\ell=1}^L m_\ell m_{\ell+1}.$$

This gives a bound for the distance between  $\hat{f}$  and  $f^*$ . However, what we want is a bound on the distance from the true function  $f^\circ$  to  $\hat{f}$ . This can be accomplished by noticing that  $\|\hat{f} - f^\circ\|_{L_2(P_X)}^2 \leq 2(\|\hat{f} - f^*\|_{L_2(P_X)}^2 + \|f^\circ - f^*\|_{L_2(P_X)}^2)$ .

$f^* \|_{L_2(P_X)}^2 \leq 2\|\hat{f} - f^*\|_{L_2(P_X)}^2 + 2\hat{\delta}_{1,n}^2$ , and conclude that

$$\|\hat{f} - f^o\|_{L_2(P_X)}^2 \leq 4C_2\hat{R}_\infty^2 \left( \Phi_n + \frac{r}{n} \right) + (34 + 32\tilde{r}')\hat{\delta}_{1,n}^2 + 8\Psi_{r,n} + \frac{4(\sigma^2 + \hat{R}_\infty^2)}{n} \sum_{\ell=1}^L m_\ell m_{\ell+1}.$$

More concisely, letting

$$\alpha(U) := U^2 \frac{\sum_{\ell=1}^L m_\ell m_{\ell+1}}{n} \log_+ \left( 1 + \frac{4\sqrt{n}\hat{G} \max\{\bar{R}, \bar{R}_b\}}{U\sqrt{\sum_{\ell=1}^L m_\ell m_{\ell+1}}} \right),$$

the right side is further upper bounded as

$$\|\hat{f} - f^o\|_{L_2(P_X)}^2 \leq C_3 \left\{ \alpha(\hat{R}_\infty) + \alpha(\sigma) + \frac{(\hat{R}_\infty^2 + \sigma^2)}{n} \left[ \log_+ \left( \frac{\sqrt{n}}{\min\{\sigma/\hat{R}_\infty, 1\}} \right) + r \right] + (1 + \tilde{r}')\hat{\delta}_{1,n}^2 \right\}$$

with probability  $1 - \exp\left(-\frac{3n\hat{\delta}_{1,n}^2\tilde{r}'^2}{32\hat{R}_\infty^2}\right) - 2\exp(-r)$  for every  $r > 0$  and  $\tilde{r}' > 0$ .

## References

- F. Bach. On the equivalence between kernel quadrature rules and random feature expansions. *Journal of Machine Learning Research*, 18(21):1–38, 2017.
- O. Bousquet. A Bennett concentration inequality and its application to suprema of empirical process. *Comptes Rendus de l'Académie des Sciences -Series I- Mathematics*, 334:495–500, 2002.
- E. Giné and V. Koltchinskii. Concentration inequalities and asymptotic results for ratio type empirical processes. *The Annals of Probability*, 34(3):1143–1216, 2006.
- E. Giné and R. Nickl. *Mathematical Foundations of Infinite-Dimensional Statistical Models*. Cambridge Series in Statistical and Probabilistic Mathematics. Cambridge University Press, 2015.
- M. Ledoux and M. Talagrand. *Probability in Banach Spaces. Isoperimetry and Processes*. Springer Berlin Heidelberg, 1991.
- S. Mendelson. Improving the sample complexity using global data. *IEEE Transactions on Information Theory*, 48(7):1977–1991, 2002.
- M. Talagrand. New concentration inequalities in product spaces. *Inventiones Mathematicae*, 126(3):505–563, 1996.
- A. W. van der Vaart and J. H. van Zanten. Information rates of nonparametric Gaussian process methods. *Journal of Machine Learning Research*, 12:2095–2119, 2011.
- A. W. van der Vaart and J. A. Wellner. *Weak Convergence and Empirical Processes: With Applications to Statistics*. Springer, New York, 1996.
